# Supplementary material
Source: Research Square preprint supplement (doi:10.21203/rs.3.rs-9355031/v1)
Supplement: Supplementary file 1 [file 3252393834bf3f2660321066.docx]

**Supplementary Figure 1.** An investigation into the effects of cordycepin on the proliferation of normal mammary epithelial cells 10A, its effects on the proliferation of TNBC *in vivo*, and statistical graphs of the relevant experiments.

1. Normal MCF-10A mammary epithelial cells were treated with cordycepin at different concentrations for 48 hours, and relative cell viability was assessed. (B) An Hs 578T TNBC xenograft tumour model was established and treated with 20 mg/kg cordycepin or a solvent control for 21 days; it was found that cordycepin effectively inhibited the proliferation of breast cancer cells in vivo. (C) Statistical graph showing the expression levels of cyclin-related proteins in MDA-MB-468 and Hs 578T TNBC cells treated with different concentrations of cordycepin for 48 hours. (D) Statistical graph showing the effect of different concentrations of cordycepin on the colony-forming ability of TNBC cells MDA-MB-468 and Hs 578T. (E) Statistical graph showing the expression of cyclin-related proteins in MDA-MB-468 and Hs 578T TNBC cells following treatment with cordycepin, paclitaxel alone, or a combination of both. (F) Statistical graph of the migration assay on MDA-MB-468 and Hs 578T TNBC cells treated with cordycepin and paclitaxel, either alone or in combination. (G) Statistical graph showing the effects of cordycepin and paclitaxel, administered alone or in combination, on the expression of EMT-related proteins in MDA-MB-468 and Hs 578T TNBC cell lines.

**Supplementary Figure 2**. Statistical charts of relevant experimental data.

1. Statistical graph showing the effects of the control group, cordycepin group, cordycepin+empty vector group, and cordycepin+HIF-1α overexpression group on the colony-forming ability of the TNBC lines MDA-MB-468 and Hs 578T. (B) Statistical graph showing the effects of the control group, cordycepin group, cordycepin+empty vector group, and cordycepin+HIF-1α overexpression group on the longitudinal migration capacity of the TNBC lines MDA-MB-468 and Hs 578T. (C) Statistical graph showing the effects of the control group, cordycepin group, cordycepin+empty vector group, and cordycepin+HIF-1α overexpression group on the horizontal migration capacity of the TNBC lines MDA-MB-468 and Hs 578T. (D) Statistical graph showing the effects of the control group, cordycepin group, cordycepin+empty vector group, and cordycepin+HIF-1α overexpression group on the expression levels of RAD51, cell cycle and EMT related proteins in the TNBC lines MDA-MB-468 and Hs 578T. (E) Statistical graph showing the effects of the control group, cordycepin group, paclitaxel group and cordycepin+paclitaxel combination group on the expression levels of DNA damage and repair related markers in the TNBC cell lines MDA-MB-468 and Hs 578T. (F) Statistical graph showing the effects of the control group, Cordy+PTX group, Cordy+PTX+si RAD51#2 group, and Cordy+PTX+si RAD51#1 group on the colony-forming ability of the TNBC cell lines MDA-MB-468 and Hs 578T. (G) Statistical graph showing the effect of the control group, Cordy+PTX group, Cordy+PTX+si RAD51#2 group, and Cordy+PTX+si RAD51#1 group on the longitudinal migration capacity of the TNBC cell lines MDA-MB-468 and Hs 578T.

**Supplementary Figure 3.** Statistical charts of relevant experimental data.

(A) Statistical graph illustrates the effects of the control group, Cordy+PTX, Cordy+PTX+si RAD51#2 and Cordy+PTX+si RAD51#1 on the horizontal migration capacity of the TNBC lines MDA-MB-468 and Hs 578T. (B) Statistical graph illustrates the effects of the control group, the Cordy+PTX group, the Cordy+PTX+si RAD51#2 group, and the Cordy+PTX+si RAD51#1 group on the expression levels of DNA damage repair, HIF-1α, EMT, and cell cycle-related marker proteins in the triple-negative breast cancer cell lines MDA-MB-468 and Hs 578T.

1. (B) Use CompuSyn to calculate CI values and plot fit curves to identify the concentrations exhibiting the greatest synergistic effect. (C) EdU labeling experiments demonstrated DNA replication in MDA-MB-468 and Hs 578T cells after 48 hours of treatment with cordycepin, paclitaxel, or combined therapy. (D) Colony formation assay of MDA-MB-468 and Hs 578T cells after 14 days of treatment with cordycepin, paclitaxel, or combined treatment. (E) Flow cytometric analysis of cell cycle distribution in MDA-MB-468 and Hs 578T cells following 48 hours of treatment with cordycepin, paclitaxel, or combined treatment. (F) Western blot analysis demonstrating expression levels of cell cycle related proteins (Cyclin A, Cyclin B, CDK1, and CDK2) in MDA-MB-468 and Hs 578T cells following 48 hour treatment with cordycepin, paclitaxel, or combined therapy.
