# Supplementary material
Source: Research Square preprint supplement (doi:10.21203/rs.3.rs-9355031/v1)

Figure 1

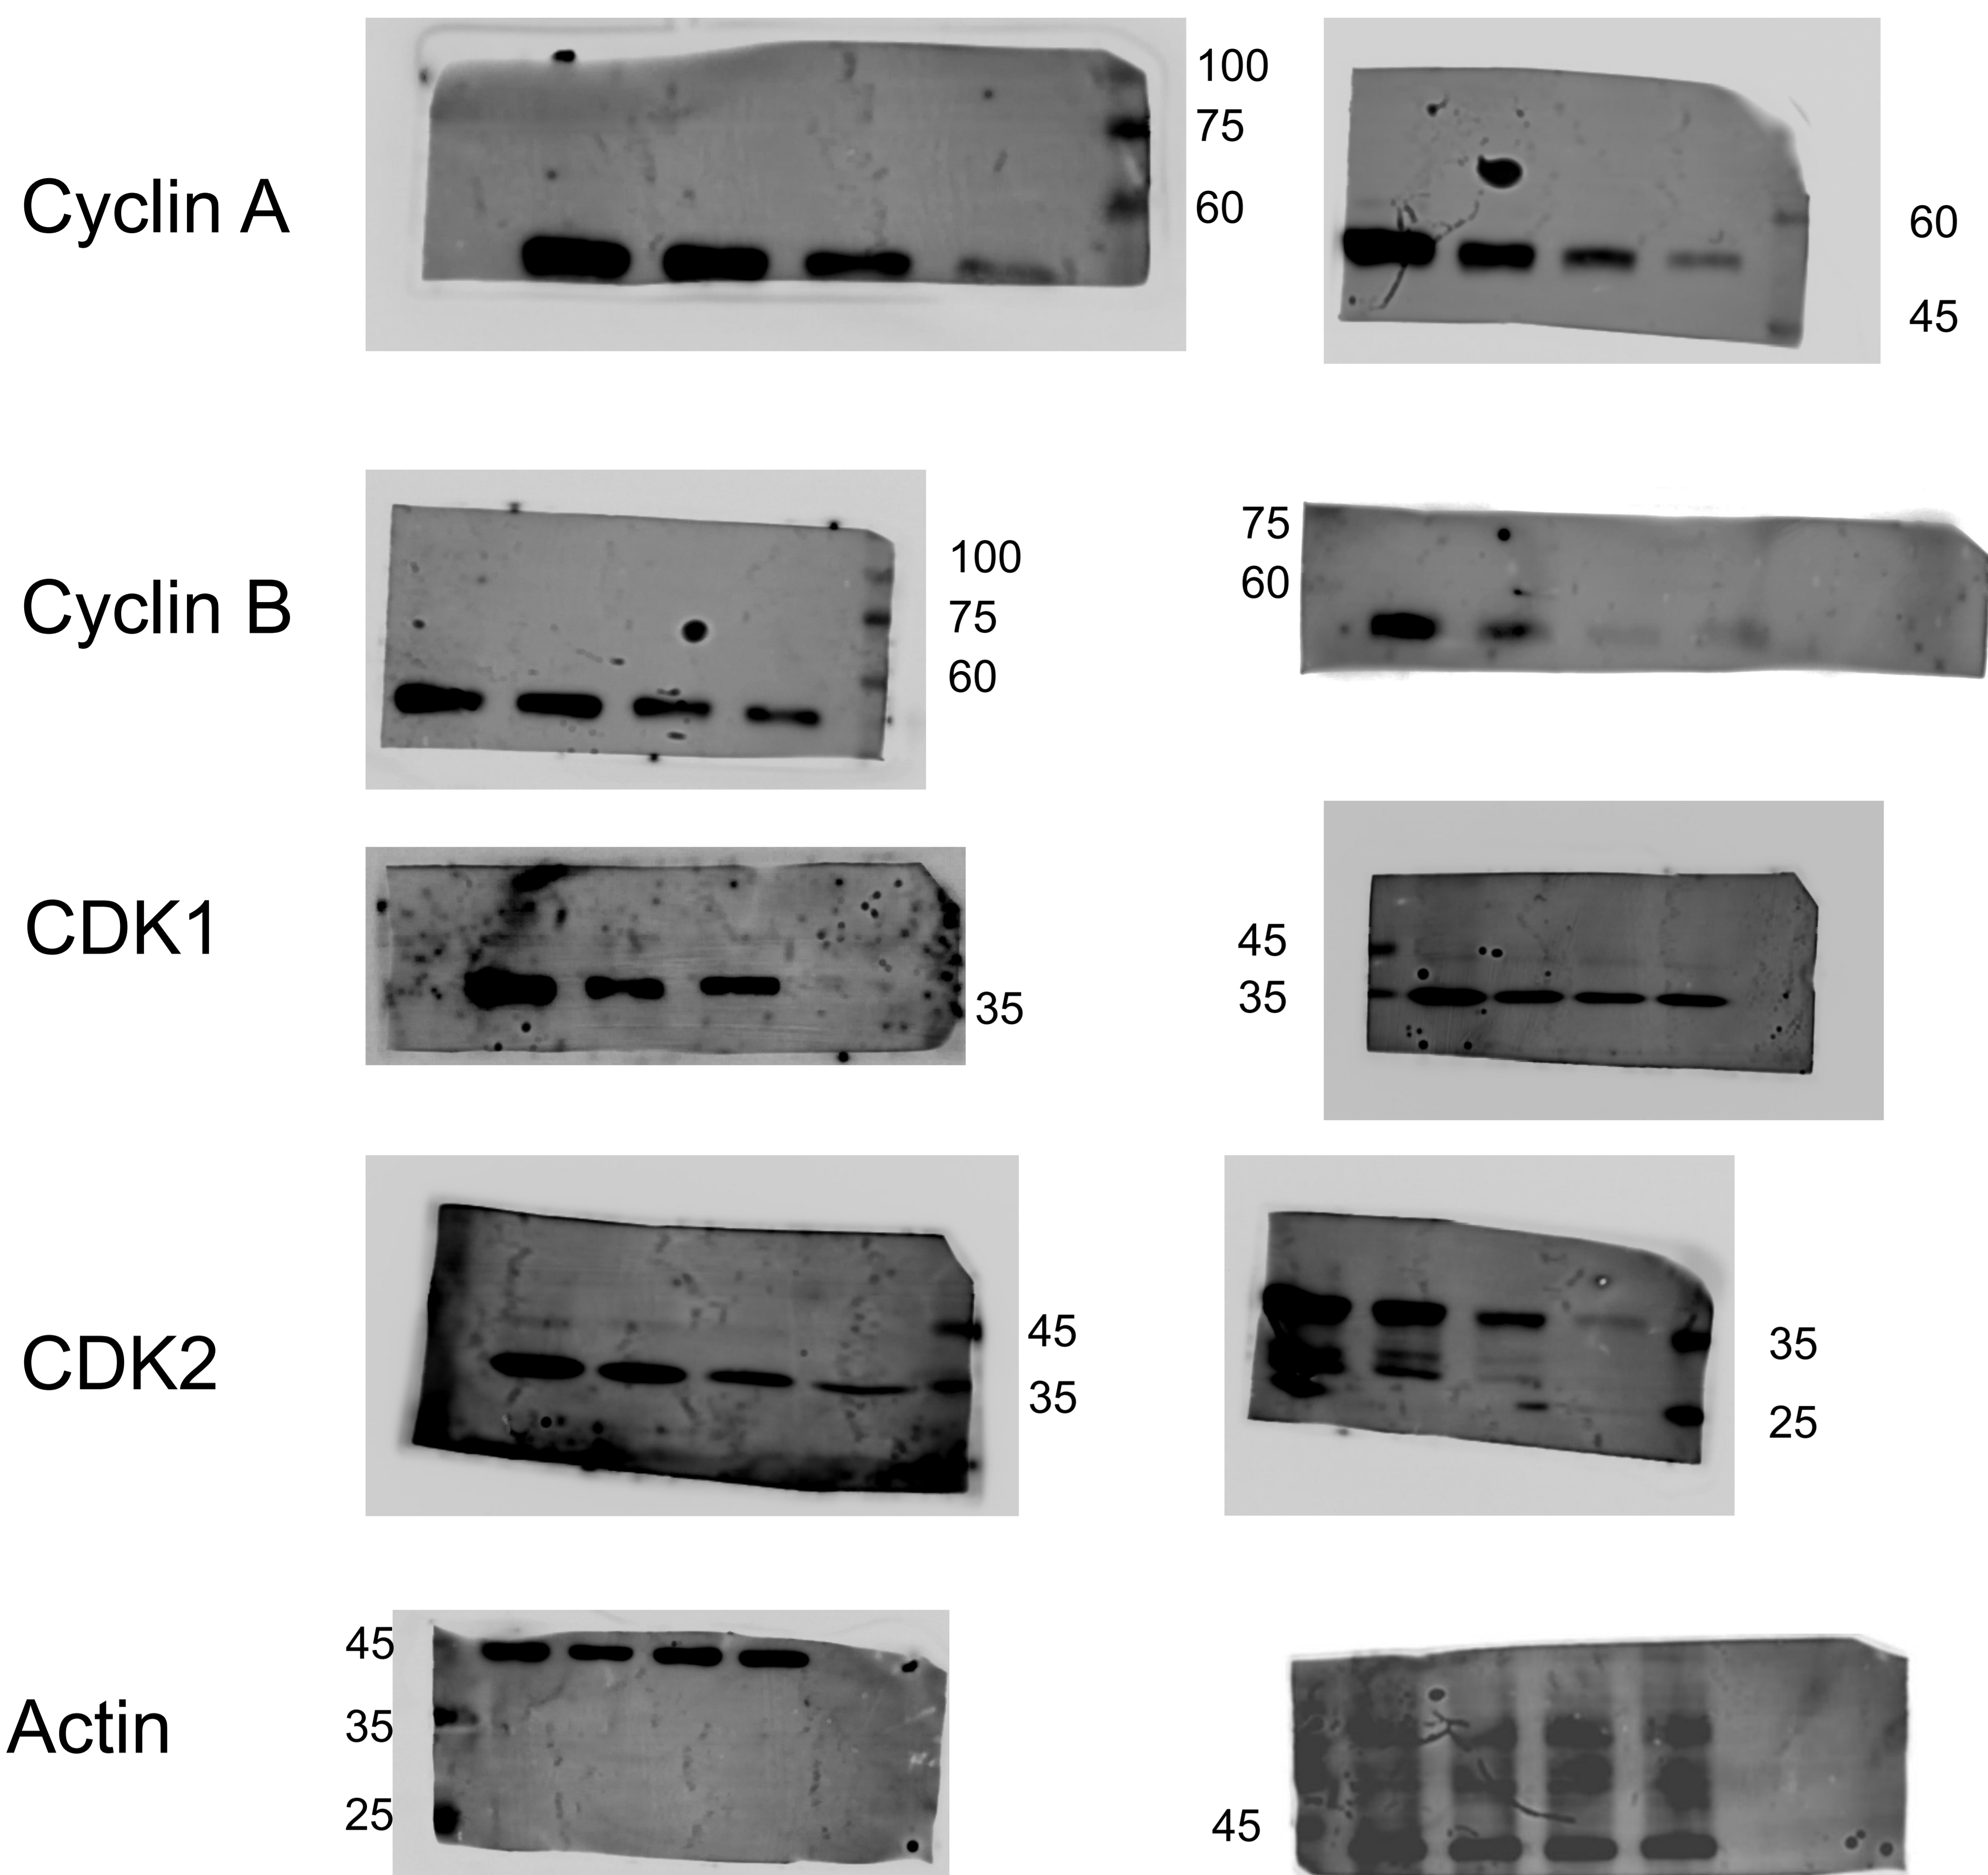

Figure 2

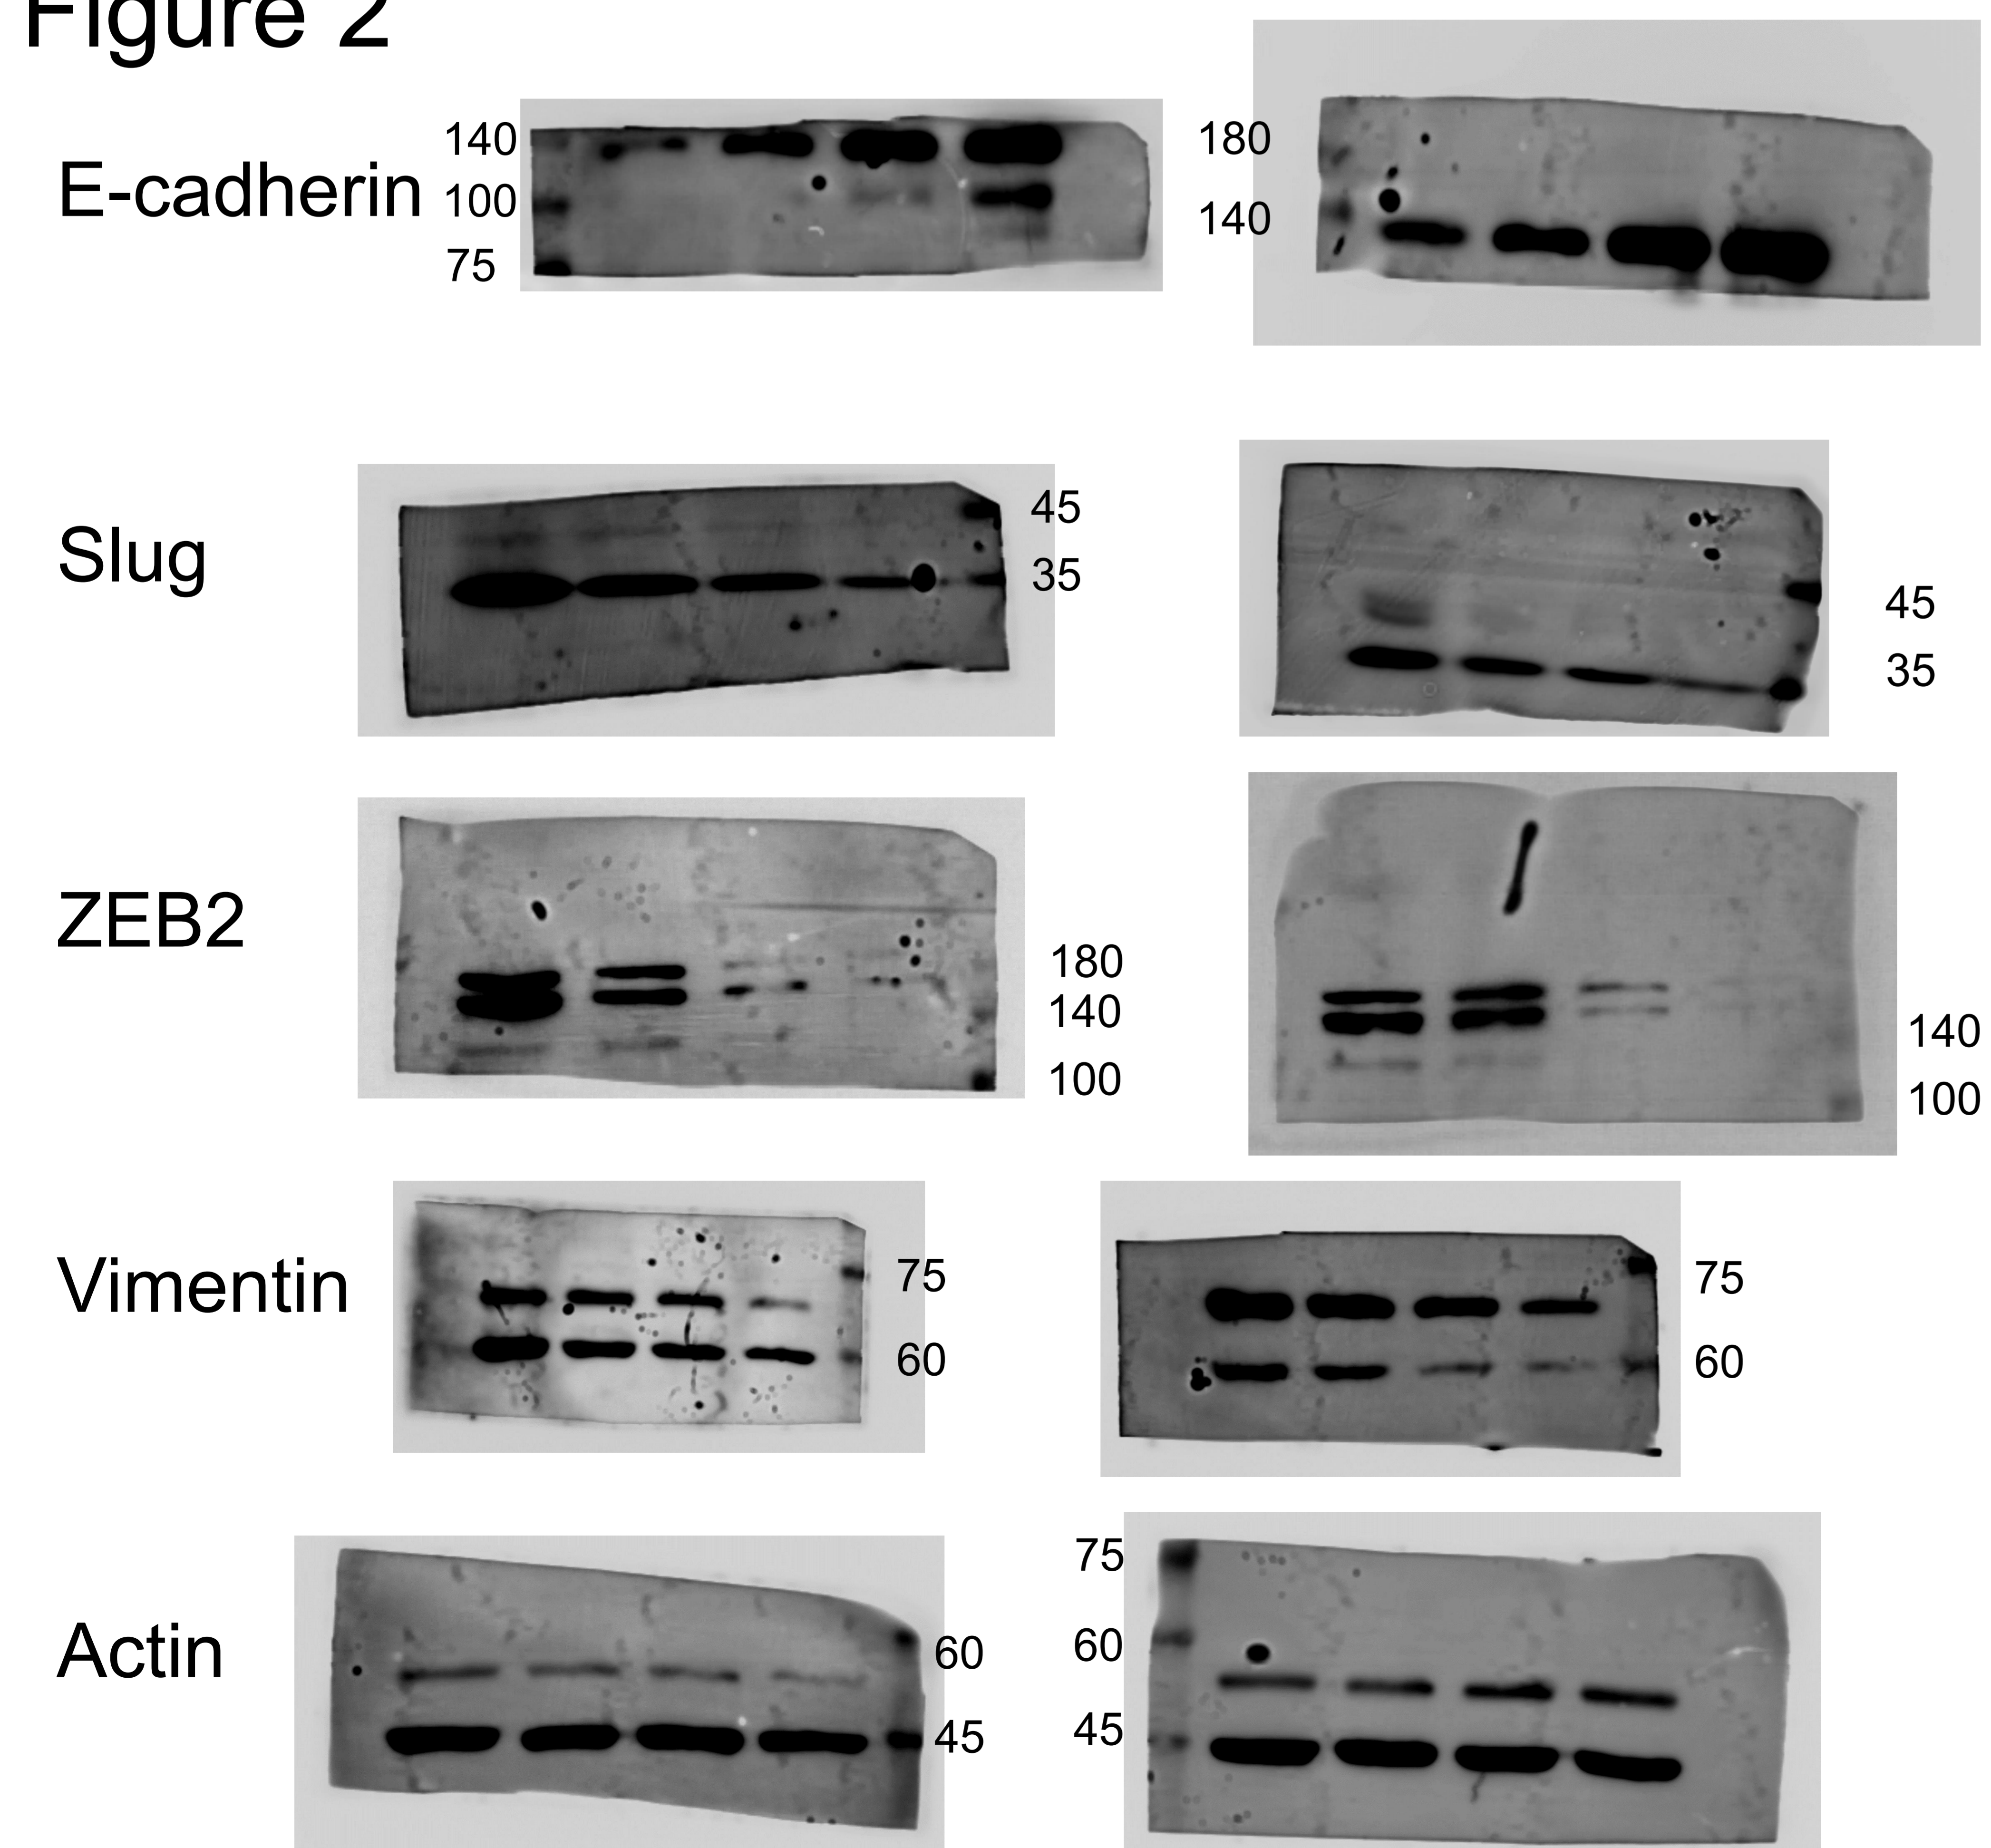

Figure 3

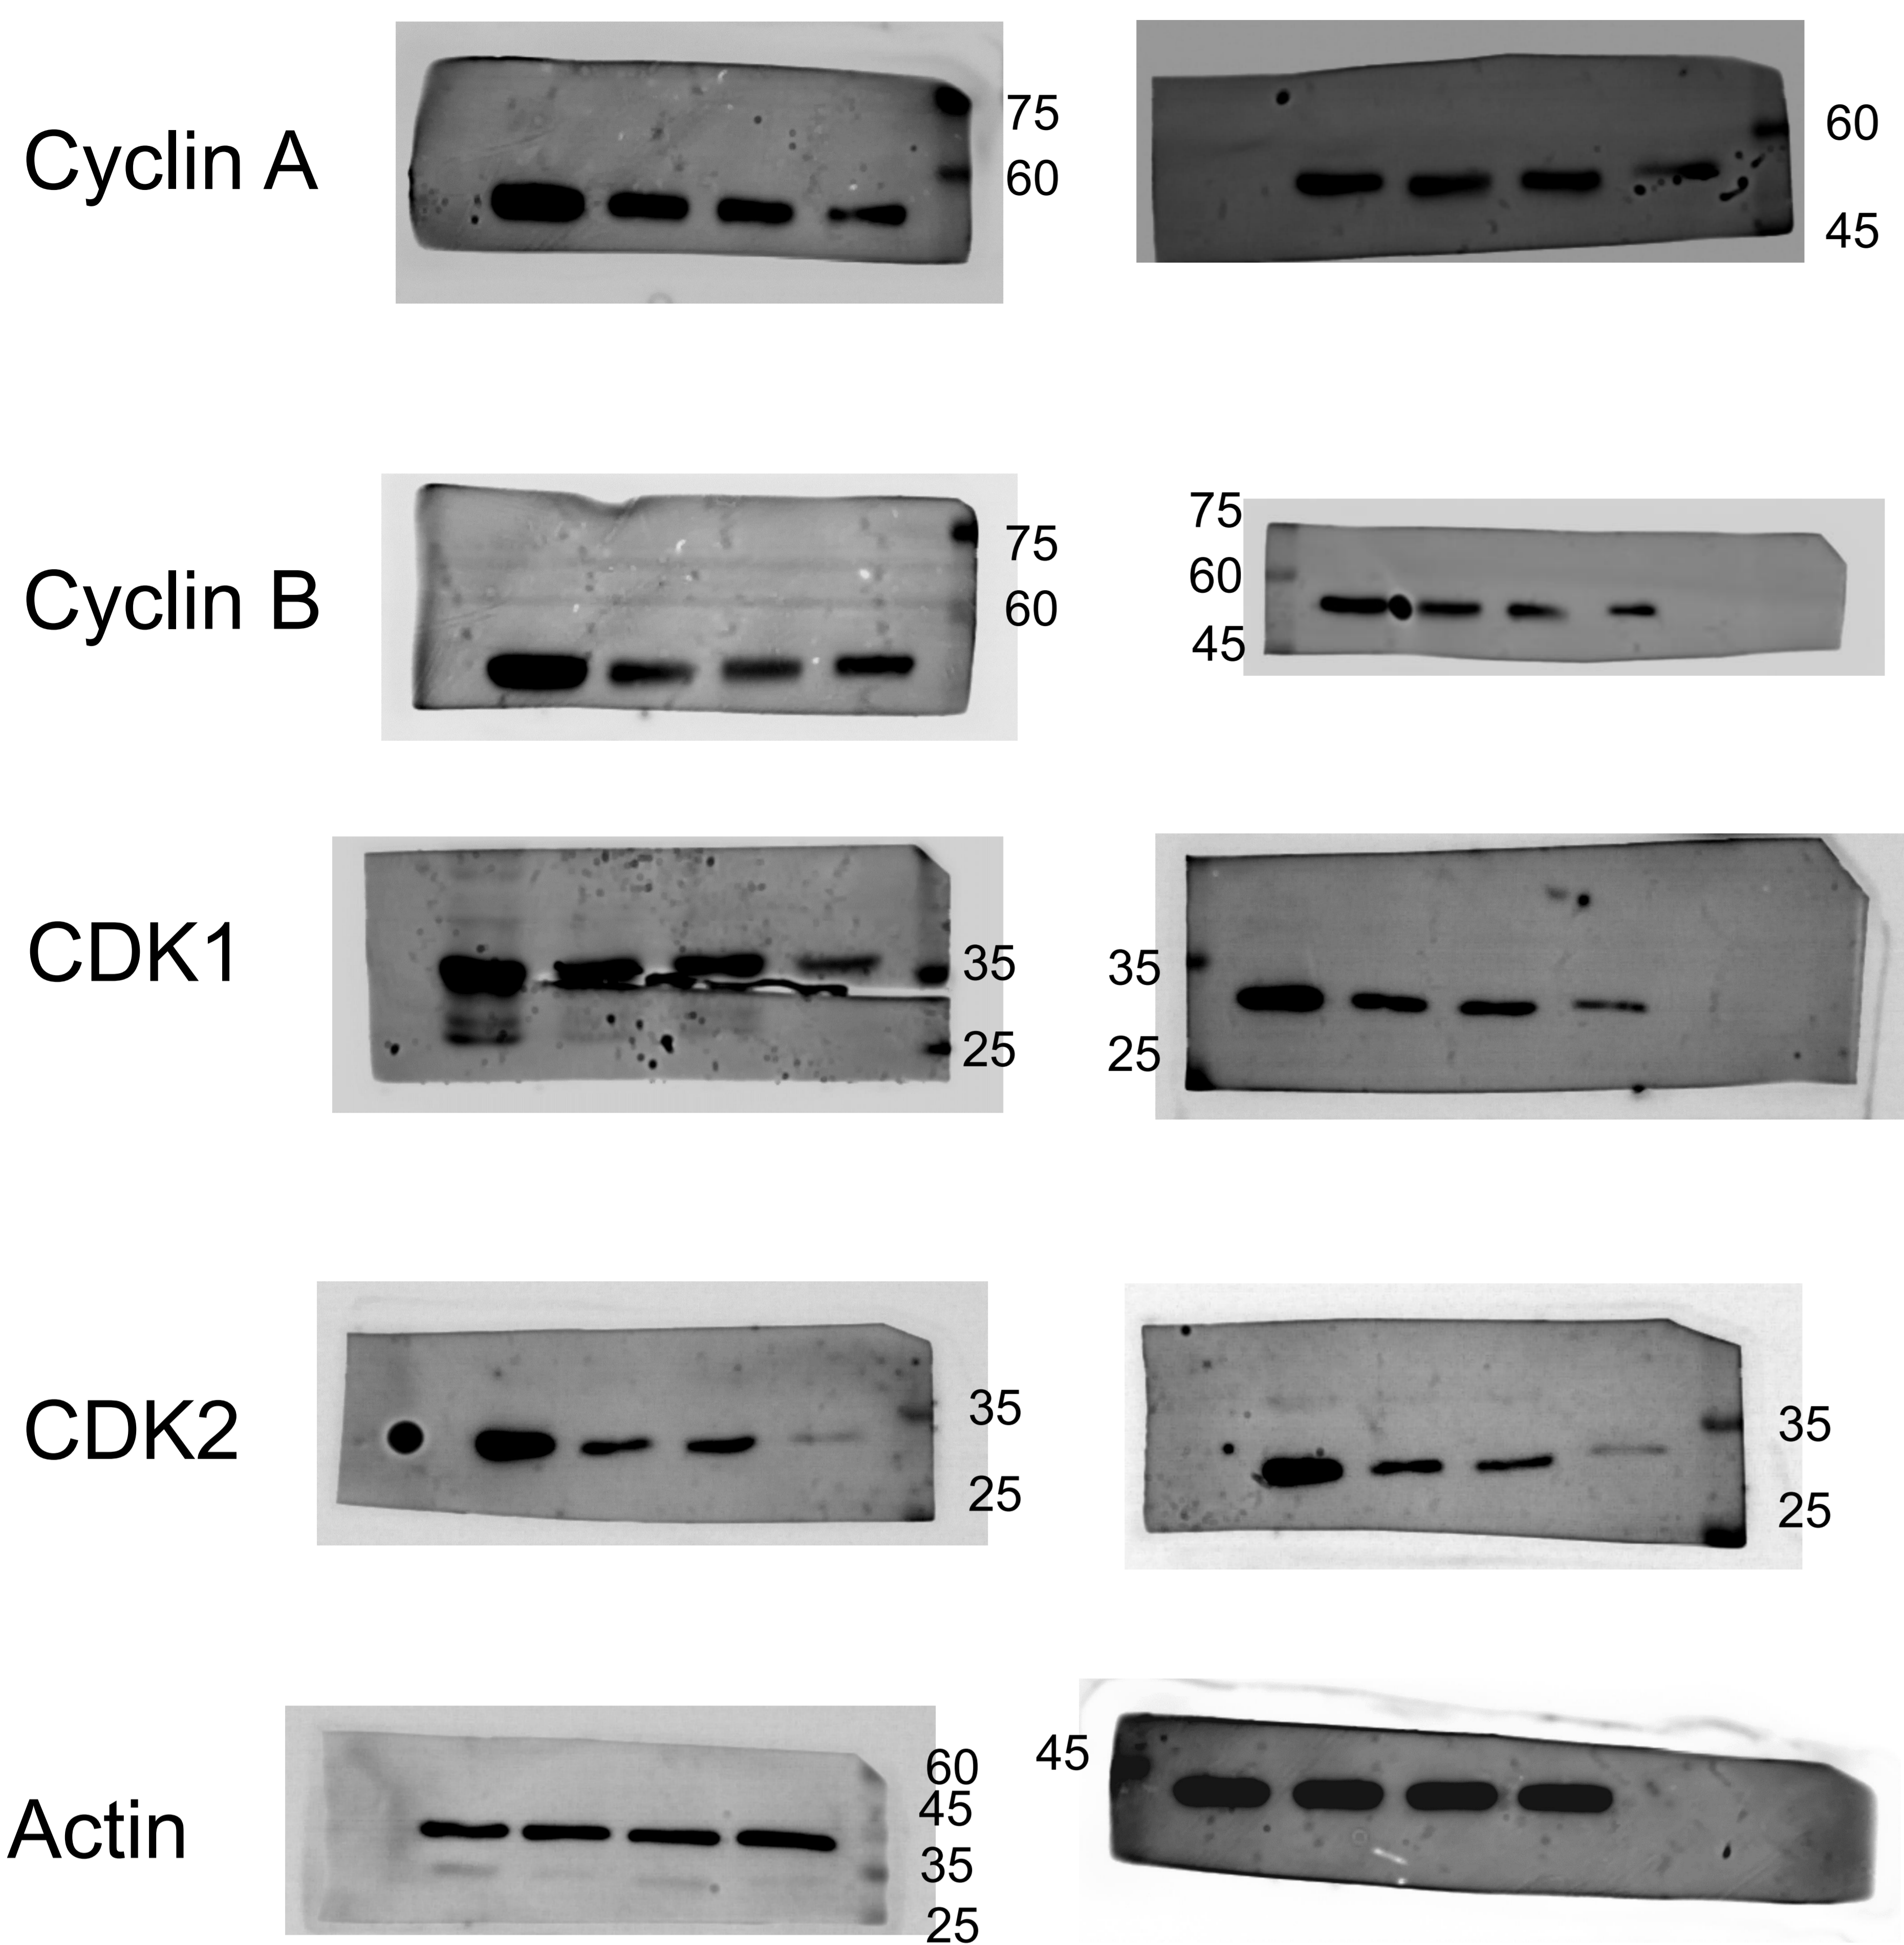

Figure 4

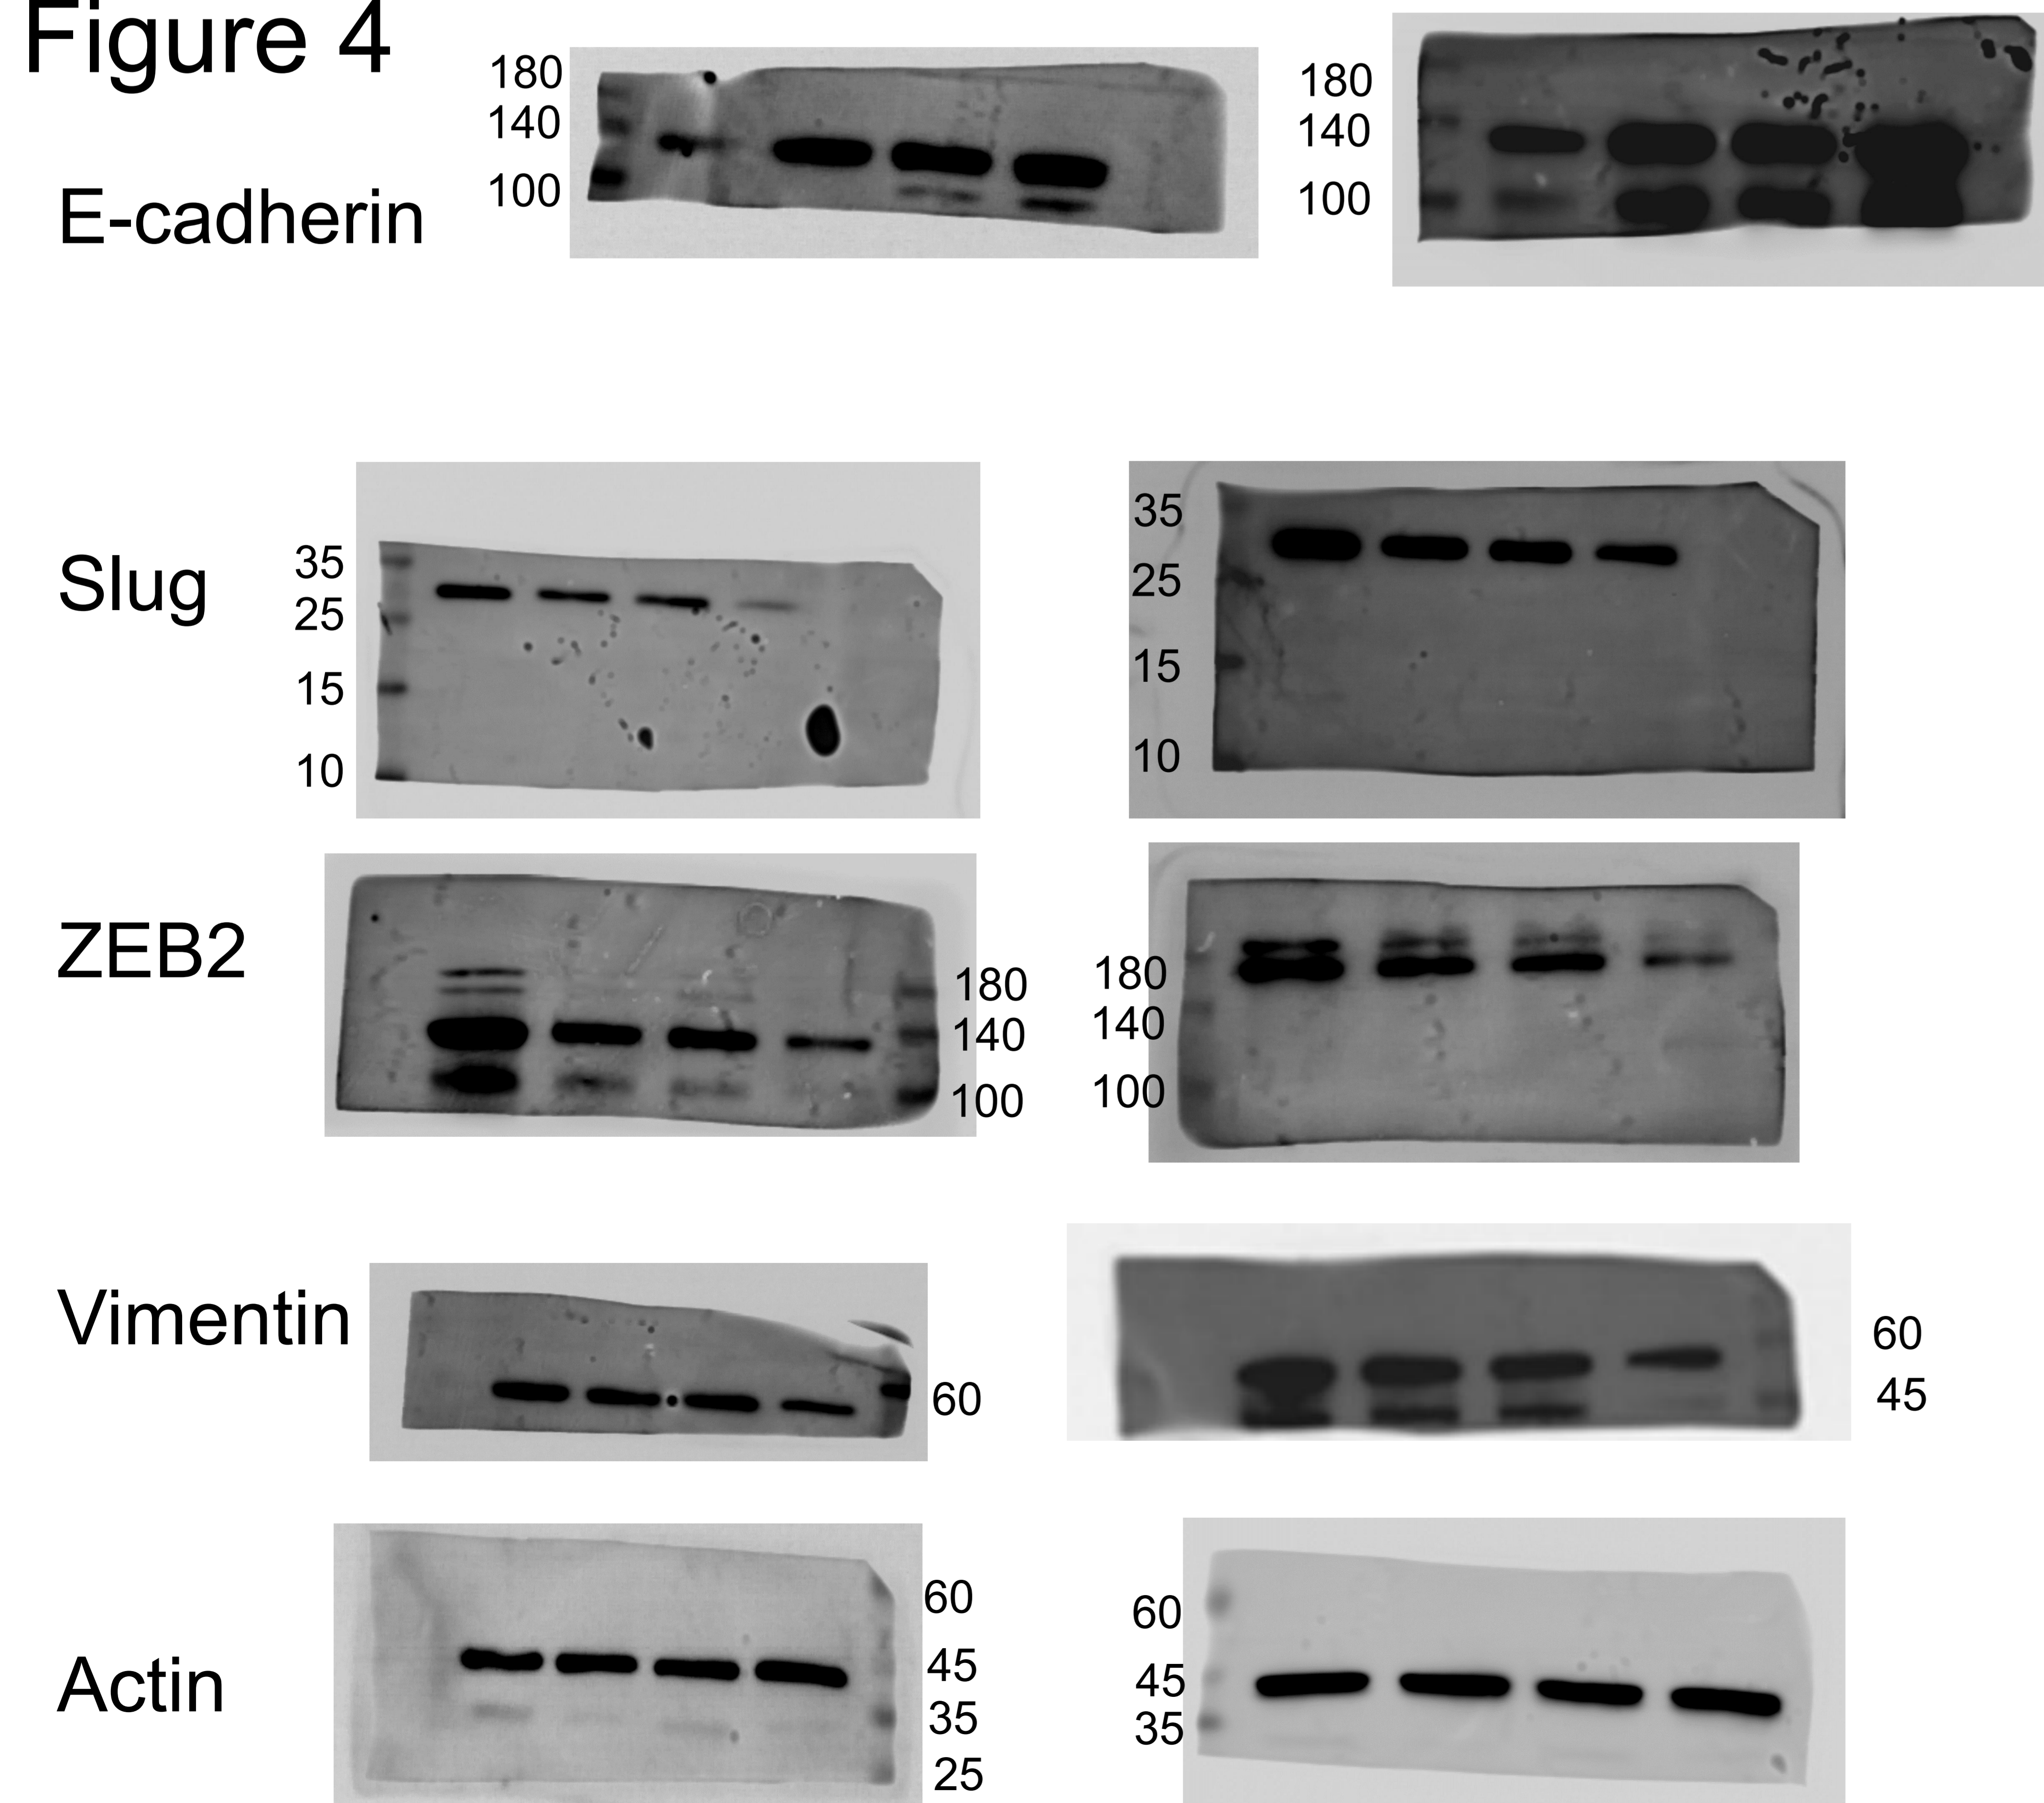

Figure 5

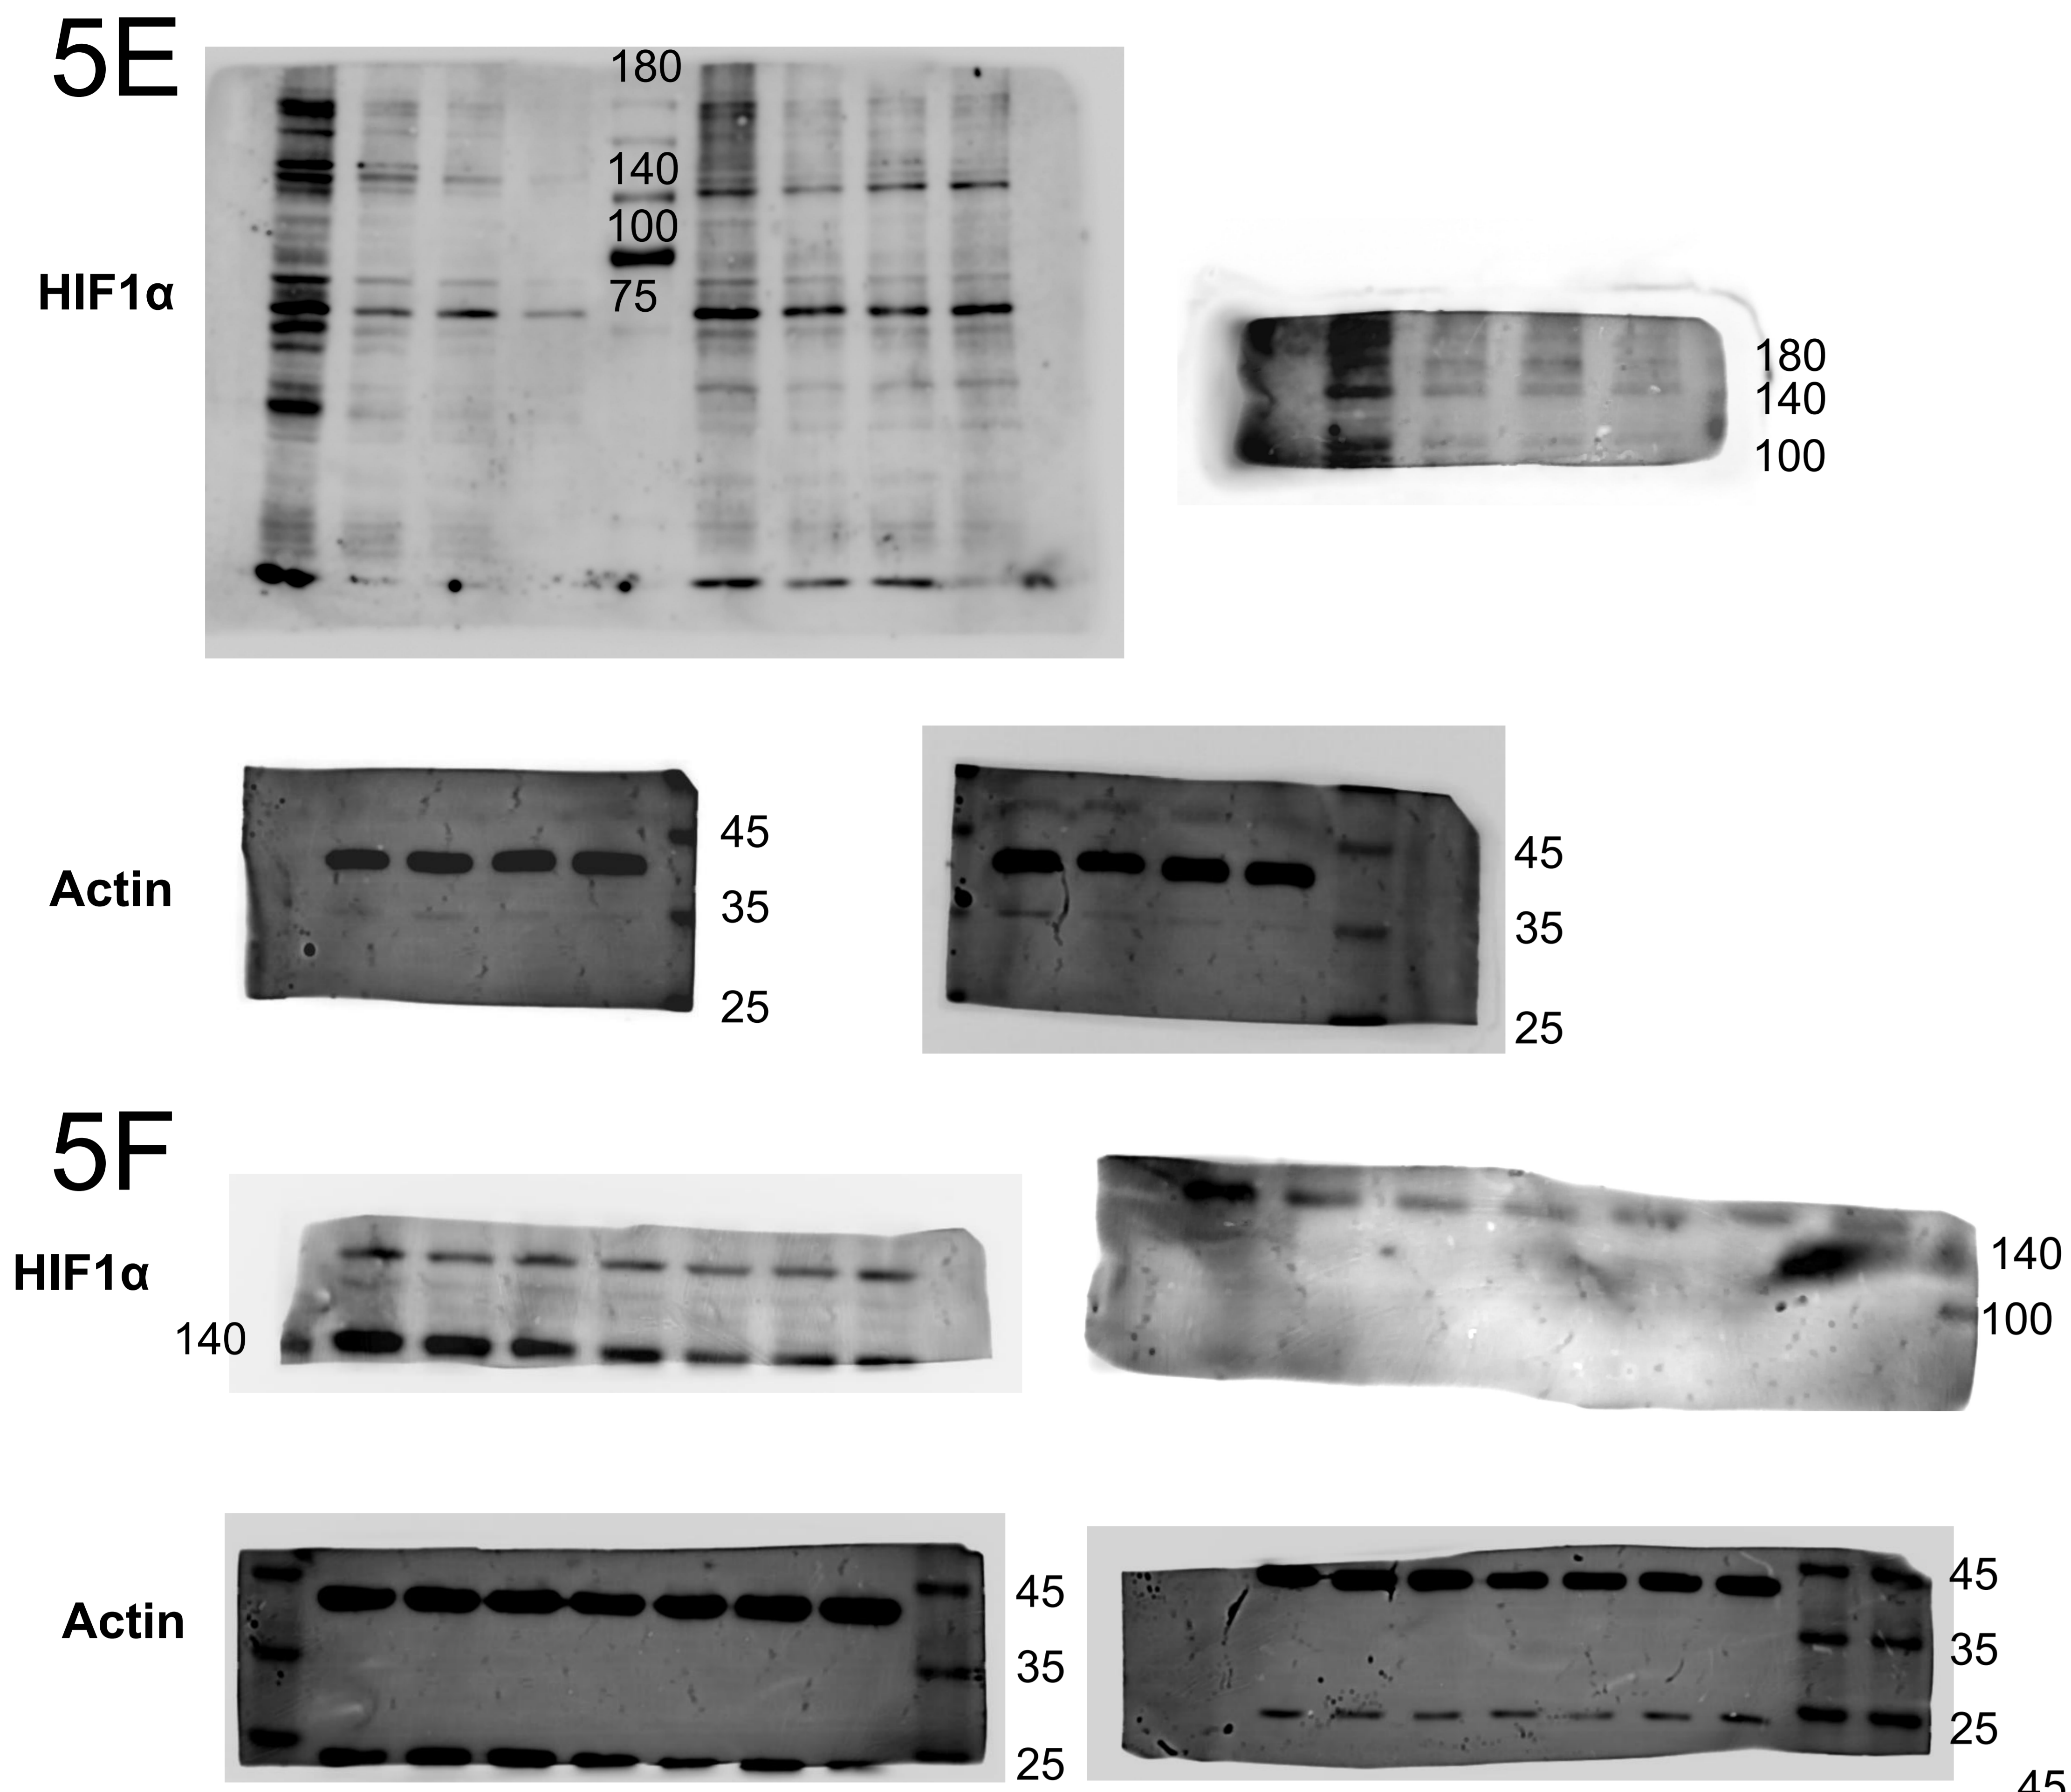

Figure 6

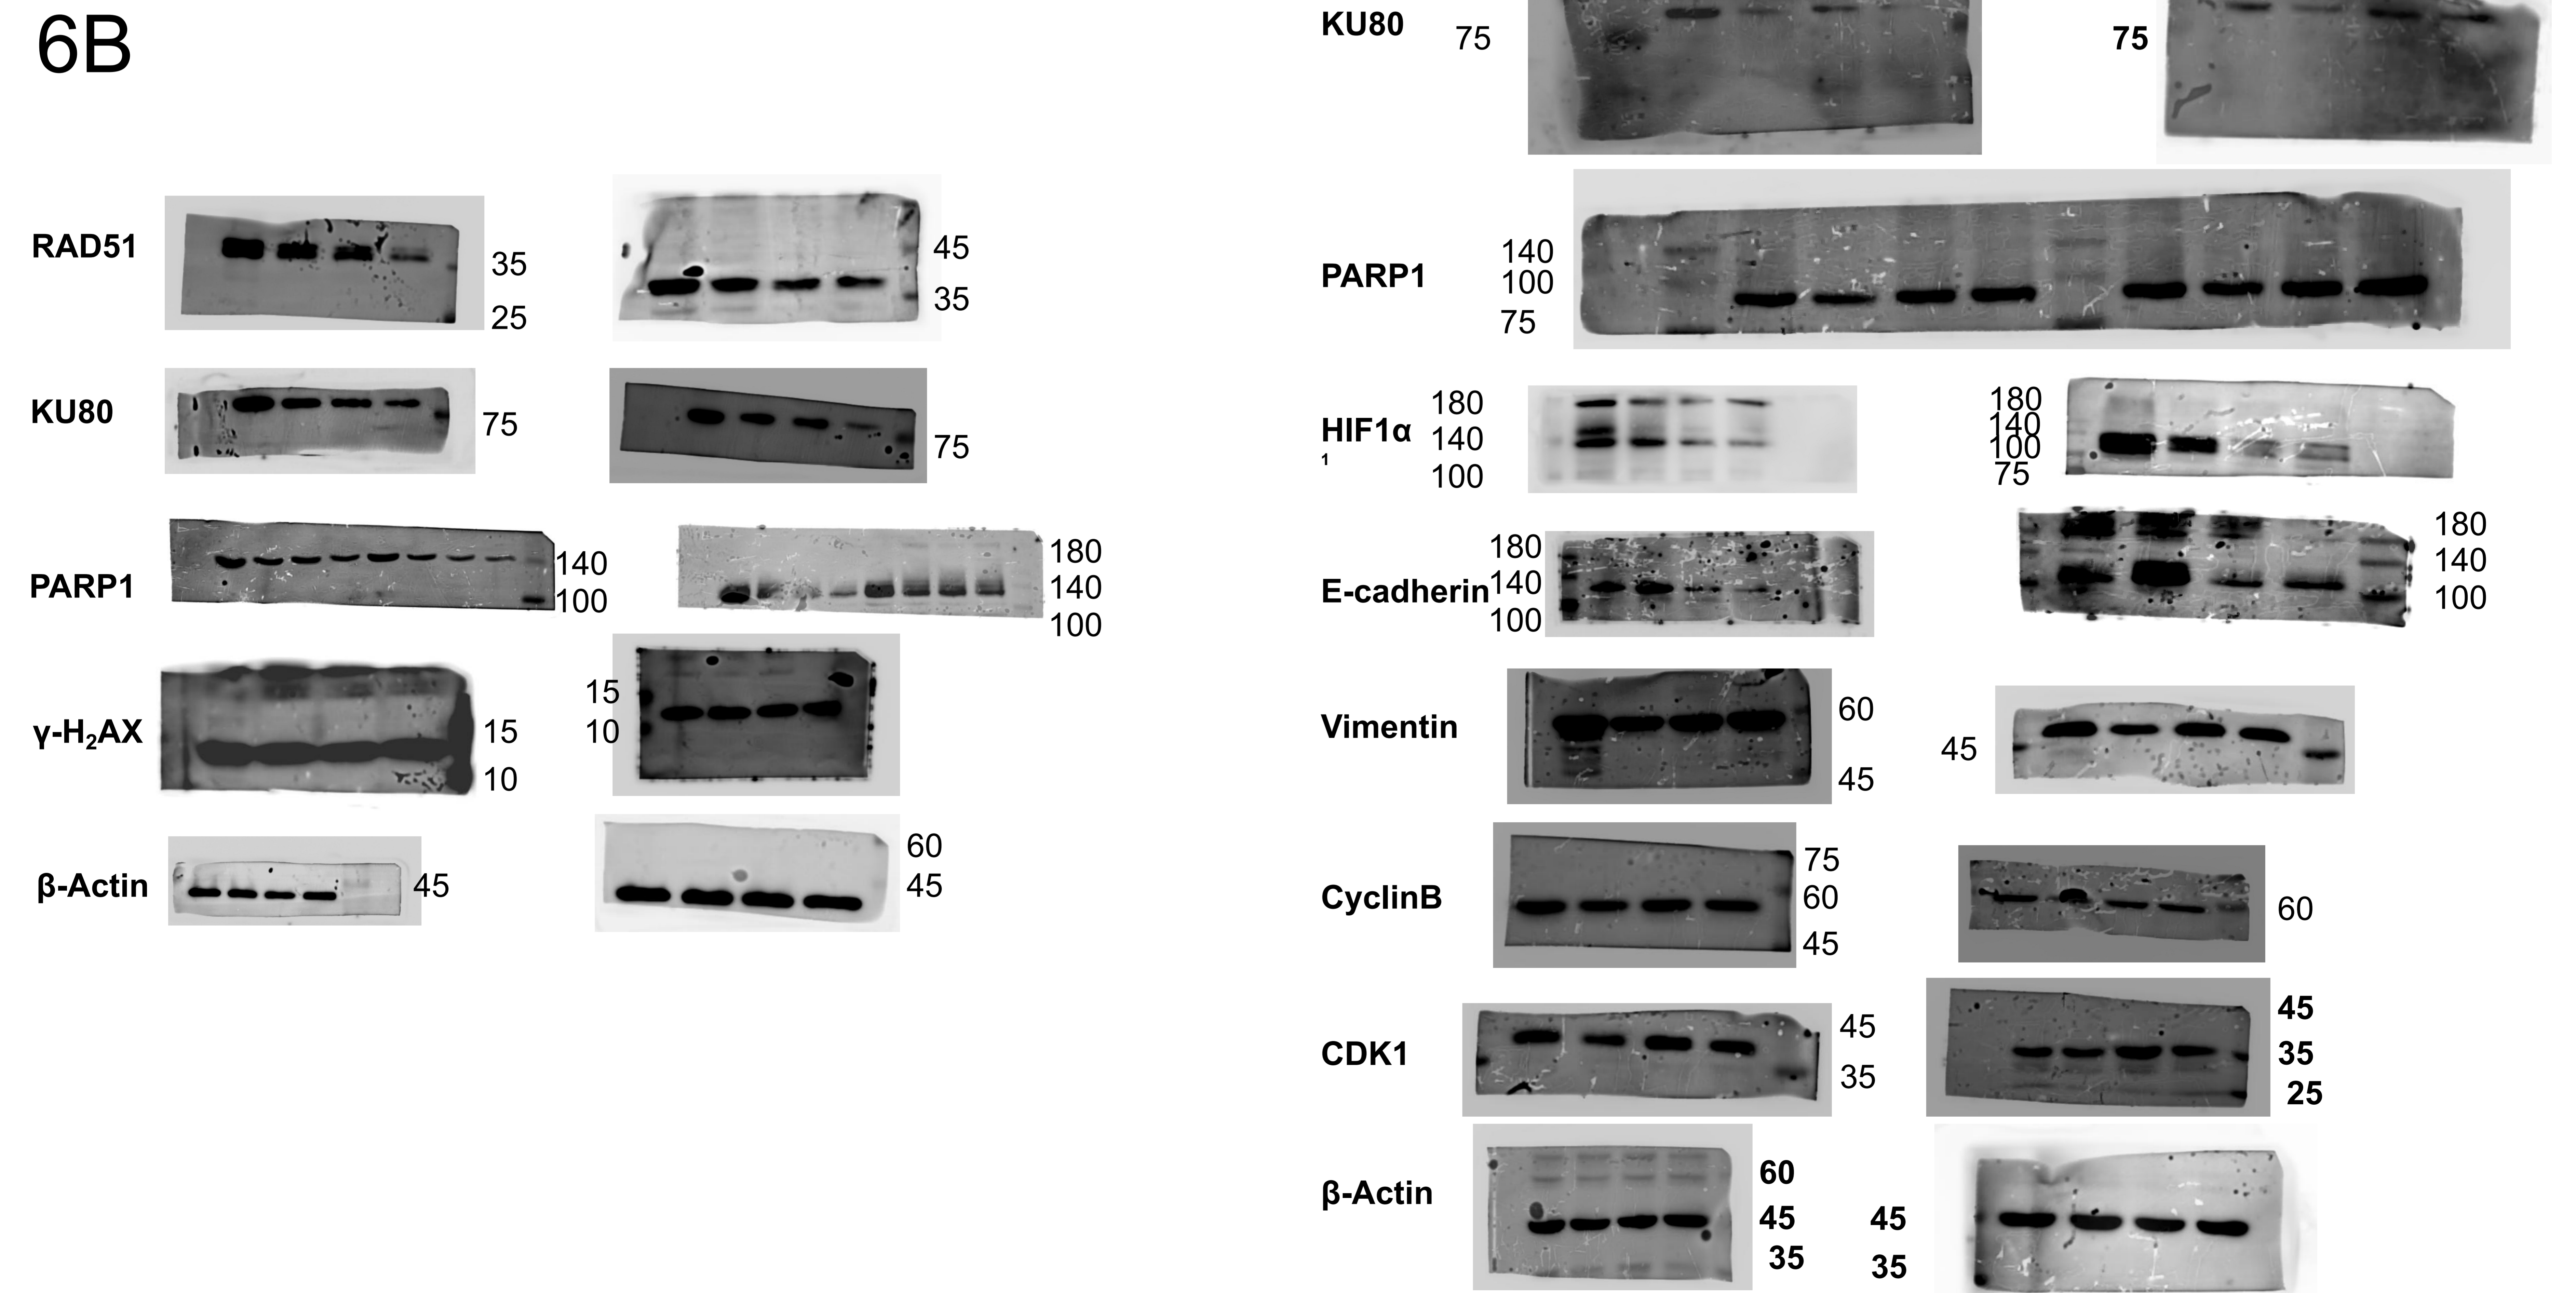

# Figure 7

## 7A

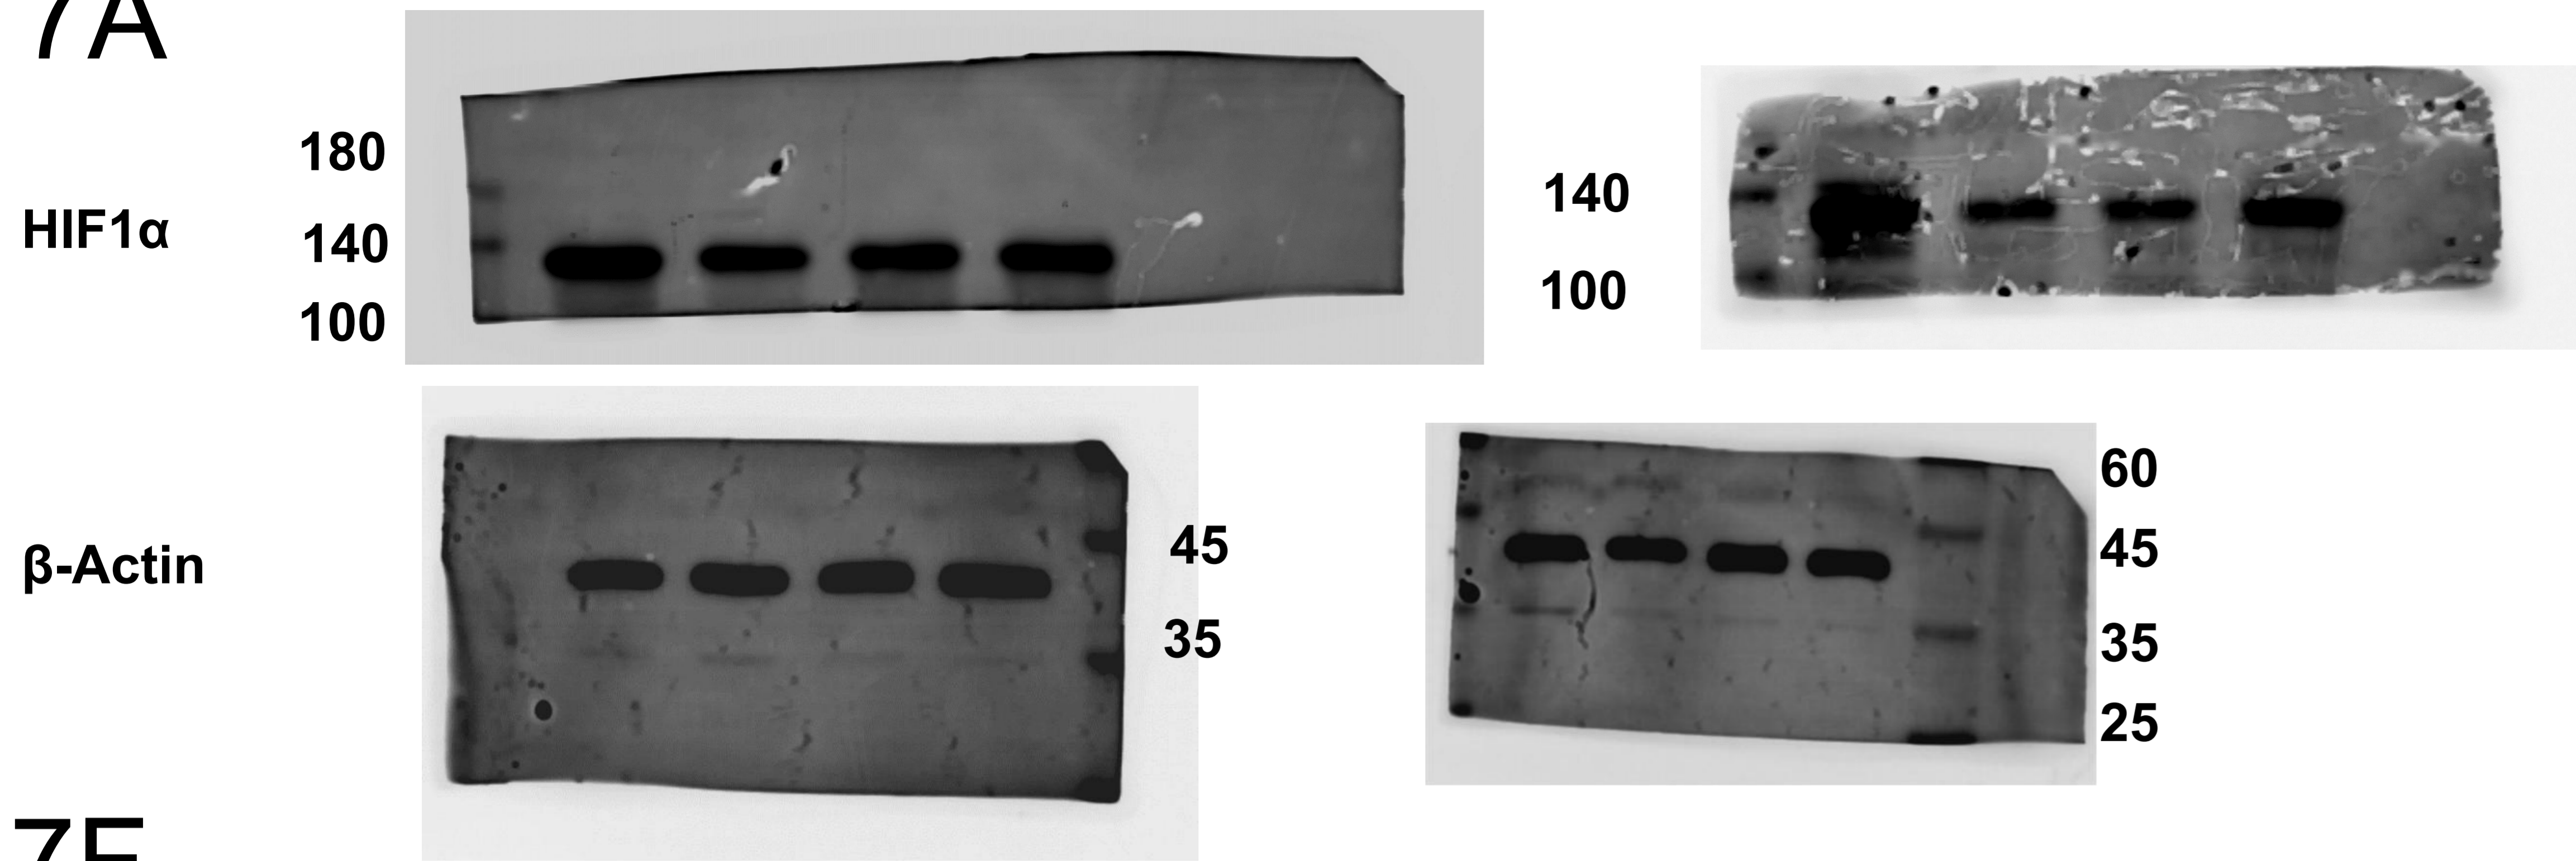

## 7F

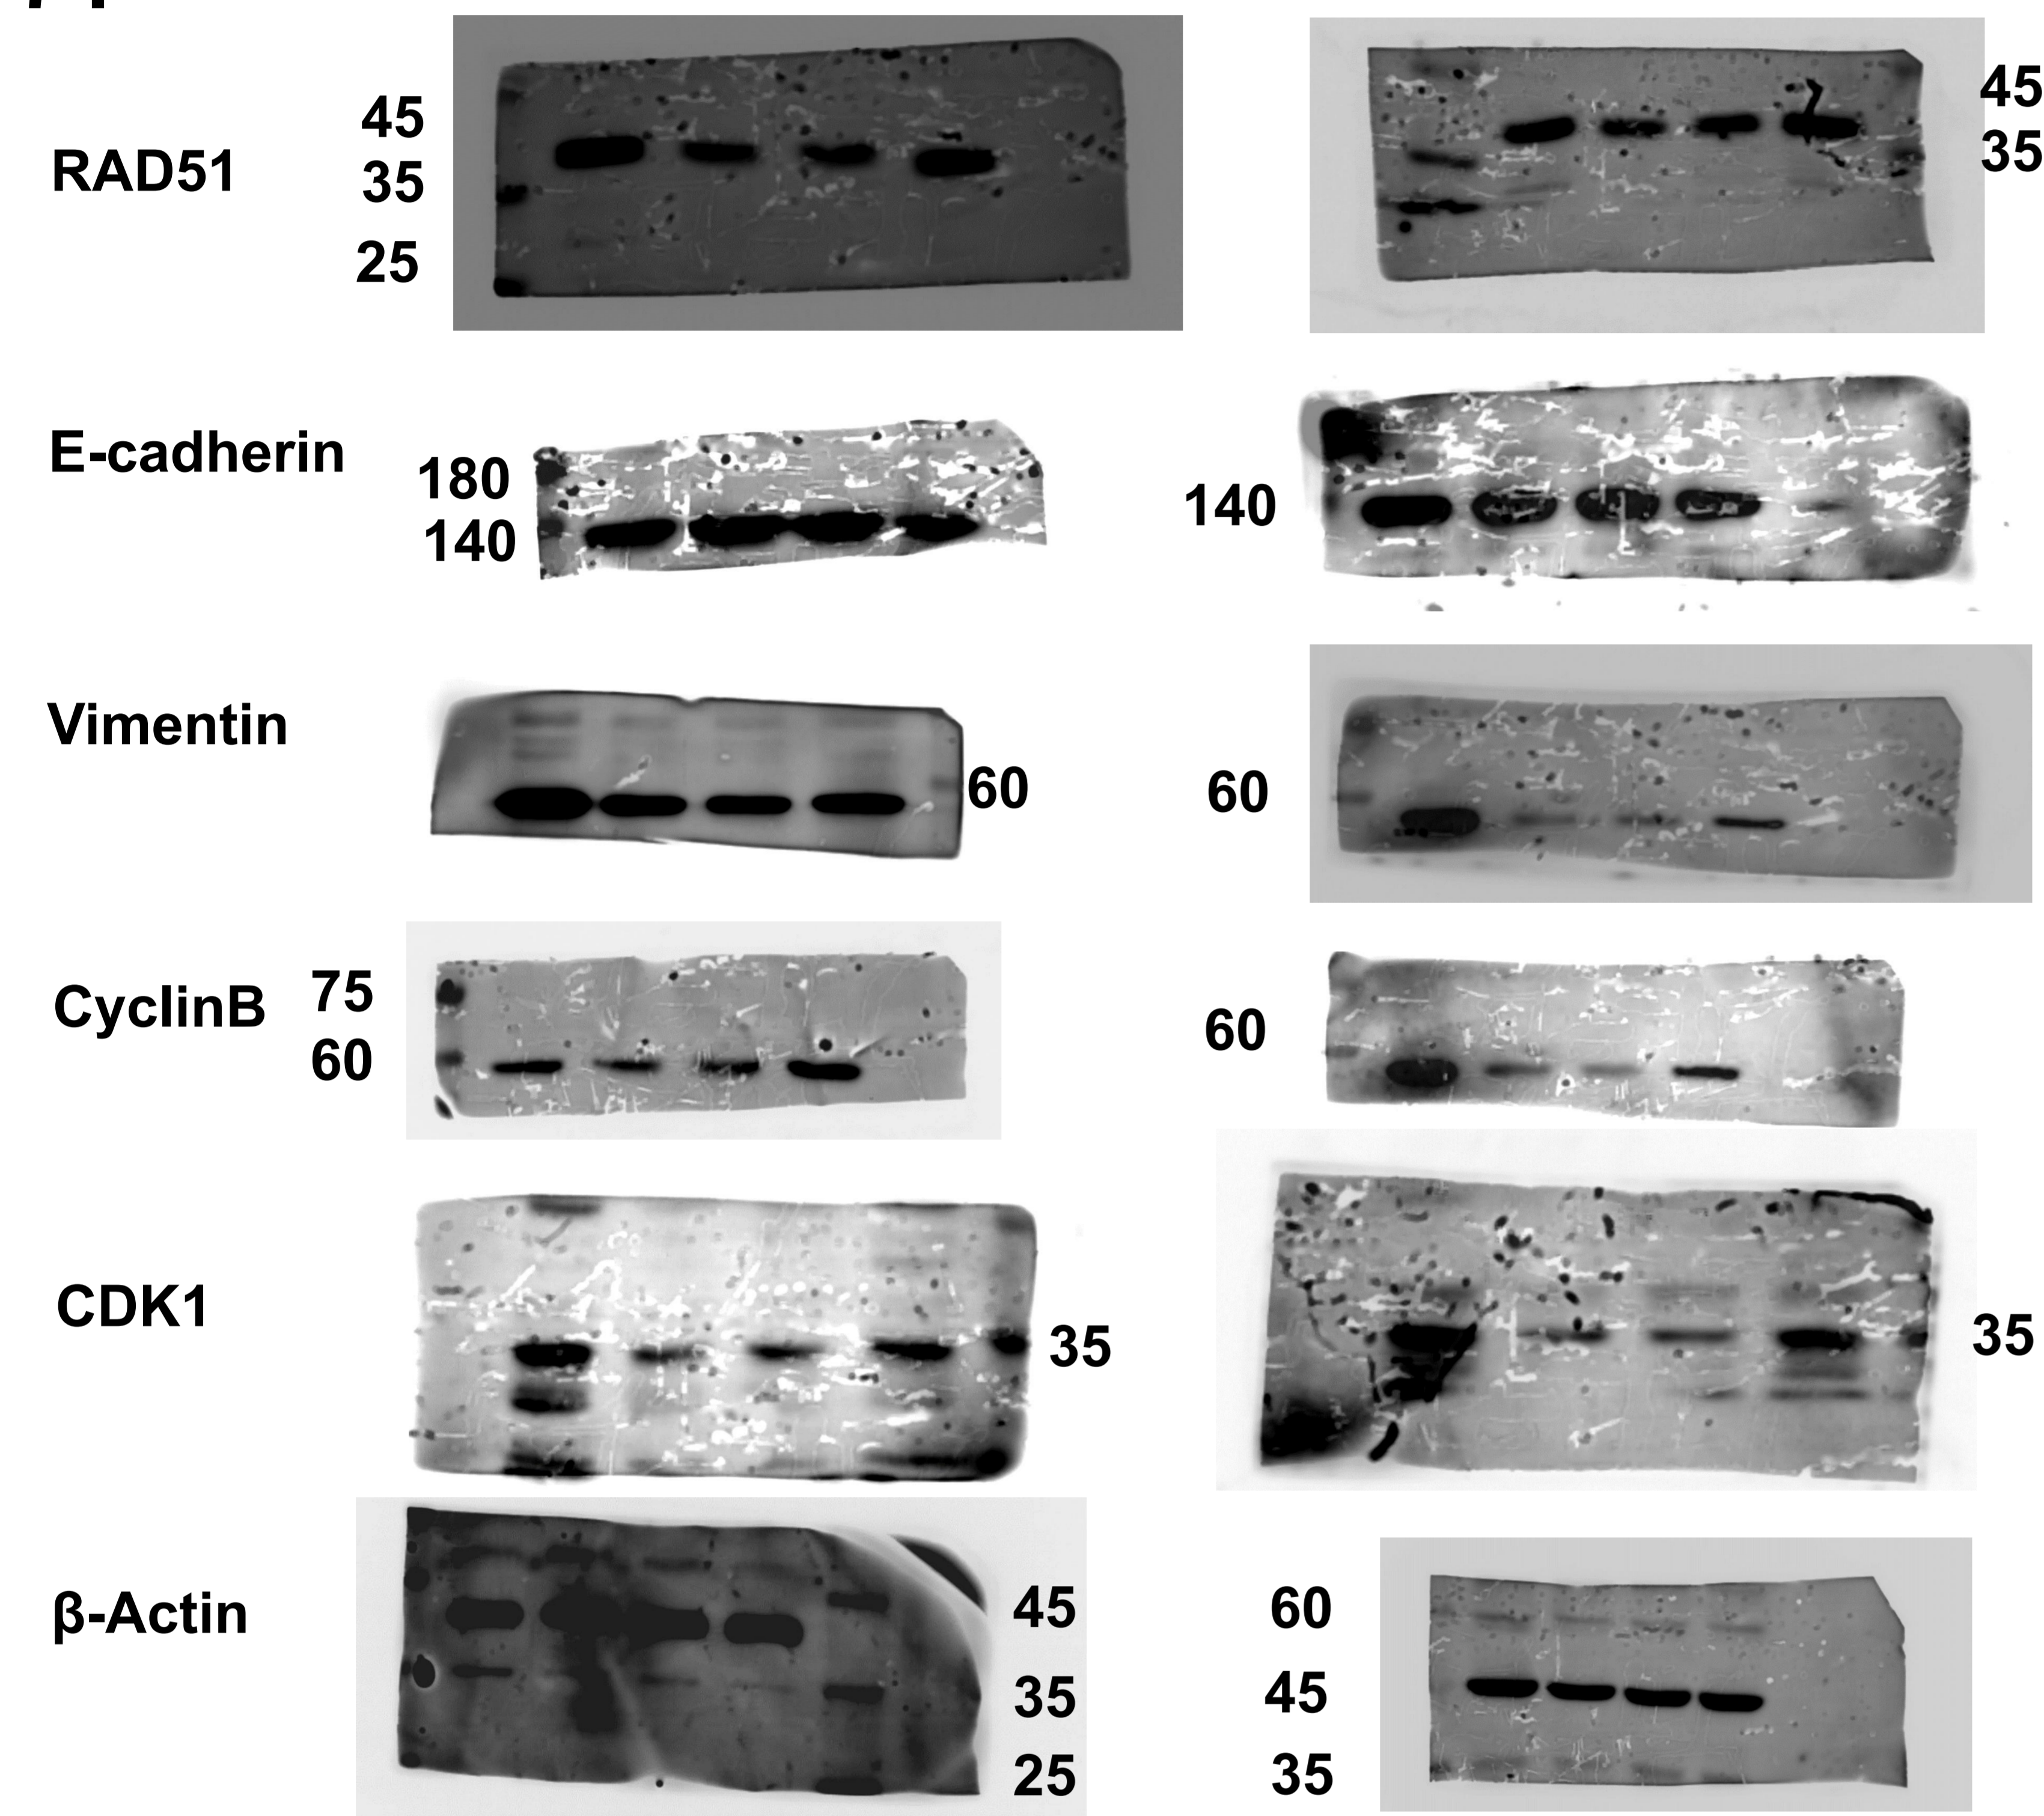

# Figure 8

## 8E

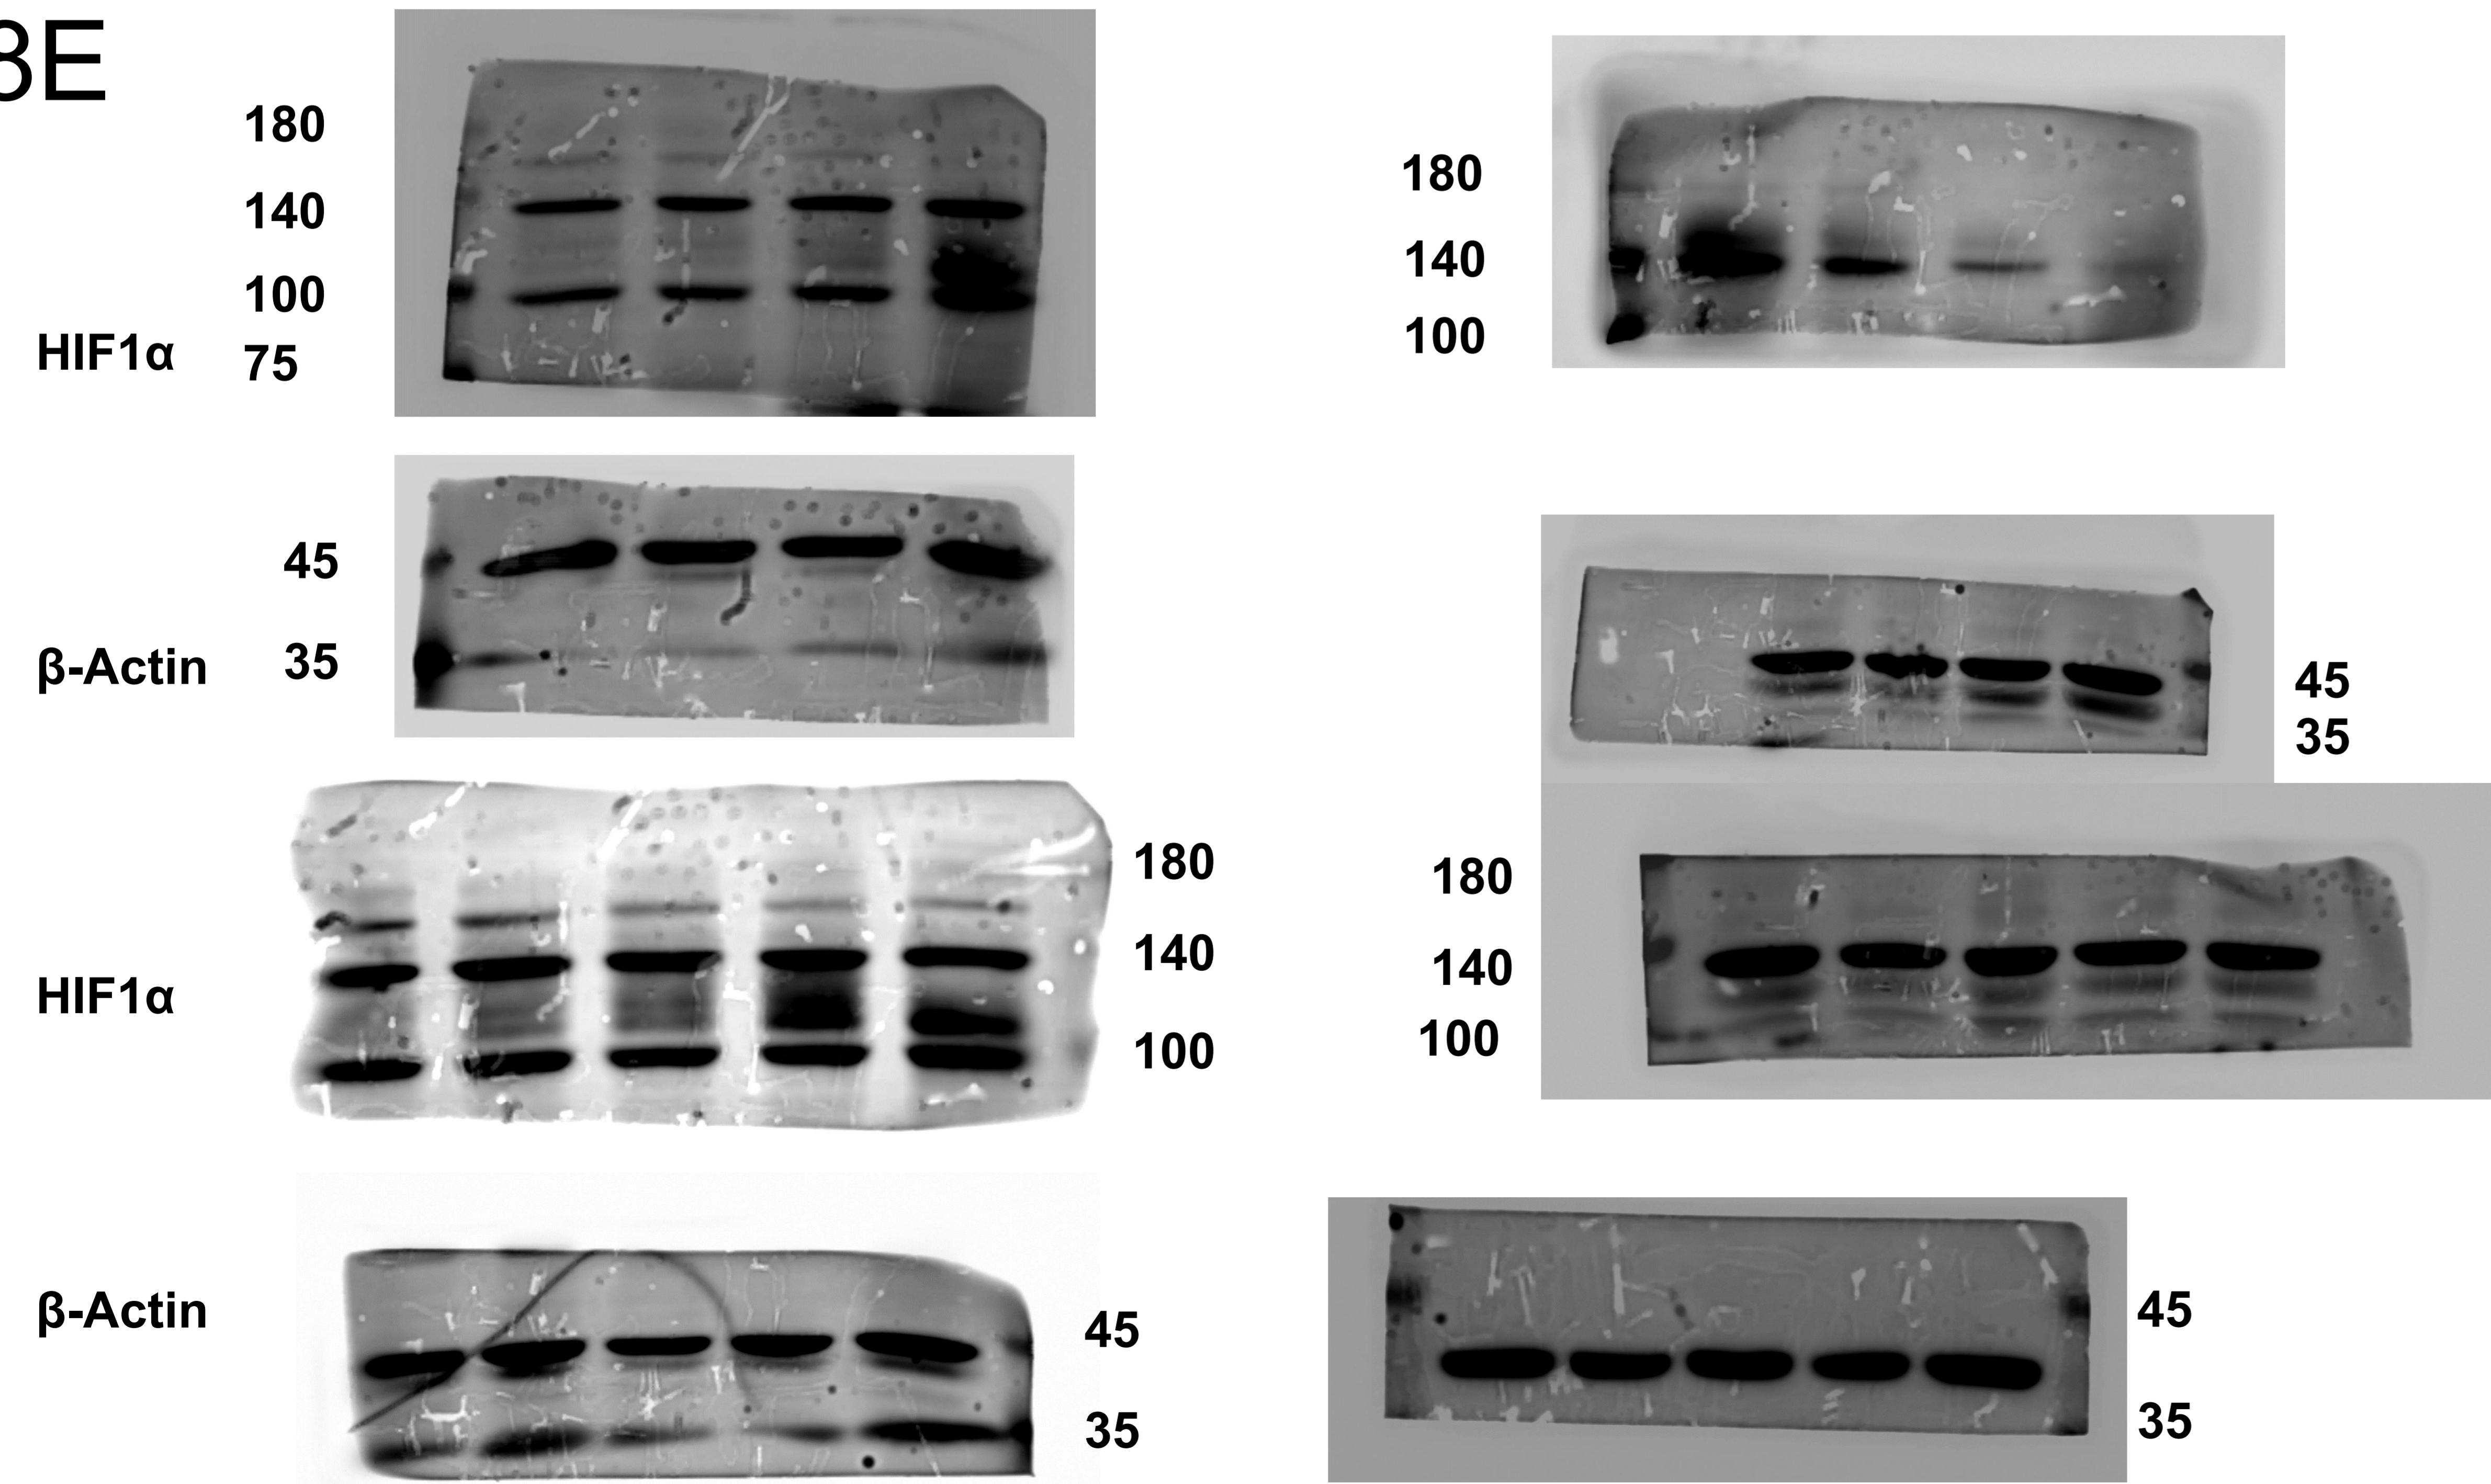

Supplement: Supplementary file 2 [file 77b2424d6d7fc14959a71fa9.pdf]
